# Supplementary material for: GPT2 Is Induced by Hypoxia-Inducible Factor (HIF)-2 and Promotes Glioblastoma Growth
Source: MDPI journal article supplement (doi:10.3390/cells11162597), 2022-08-20
Supplement: s1 [file s1]

Supplementary Material

# GPT2 Is Induced by Hypoxia-Inducible Factor (HIF)-2 and Promotes Glioblastoma Growth

Bo Zhang <sup>1,†</sup>, Yan Chen <sup>1,†</sup>, Lei Bao <sup>1</sup> and Weibo Luo <sup>1,2,\*</sup>

<sup>1</sup> Department of Pathology, UT Southwestern Medical Center, Dallas, TX 75390, USA

<sup>2</sup> Department of Pharmacology, UT Southwestern Medical Center, Dallas, TX 75390, USA

\* Correspondence: weibo.luo@utsouthwestern.edu; Tel.: +1-214-645-4770

† Both authors contributed equally to this work.

**Table S1.** The sequences of sgRNAs, shRNAs, and HRE.

|                 |                                                                   |
|-----------------|-------------------------------------------------------------------|
| GPT2-sgRNA1     | 5'-GTCGTGAACCCCCCGGTGGC-3'                                        |
| GPT2-sgRNA2     | 5'-AAGATCCTCGTCTCCGGGGG-3'                                        |
| GPT2-shRNA1     | 5'-CGGCATTCTACGATCCTGAA-3'                                        |
| GPT2-shRNA2     | 5'-GACGCCATCCAGGTGAATTAC-3'                                       |
| WT GPT2 HRE     | 5'-GTGCGGCGAGGGCCTACCAGGGGCGACAGGCACGTT<br>GCATGCATGCCTTGGGCGC-3' |
| Mutant GPT2 HRE | 5'-GTGCGGCGAGGGCCTACCAGGGGCGACAGGCTTTTTC<br>CATGCATGCCTTGGGCGC-3' |

**Table S2.** The sequences of qPCR primers.

|             |                                       |
|-------------|---------------------------------------|
| GPT2 mRNA   | Forward: 5'-ATGGCACTATGCACCTACCC-3'   |
|             | Reverse: 5'-CGGGCACGTTTCTTAGCATC-3'   |
| RPL13A mRNA | Forward: 5'-CTCAAGGTCGTGCGTCTG-3'     |
|             | Reverse: 5'-TGGCTTTCTCTTTCCTTCTC-3'   |
| 18S rRNA    | Forward: 5'-CGGCGACGACCCATTCTGAAC-3'  |
|             | Reverse: 5'-GAATCGAACCCTGATCCCCGTC-3' |
| GPT2 HRE    | Forward: 5'-CGCGAGCTAACCGAGTG-3'      |
|             | Reverse: 5'-ACACCCAACCGGCTTTC-3'      |

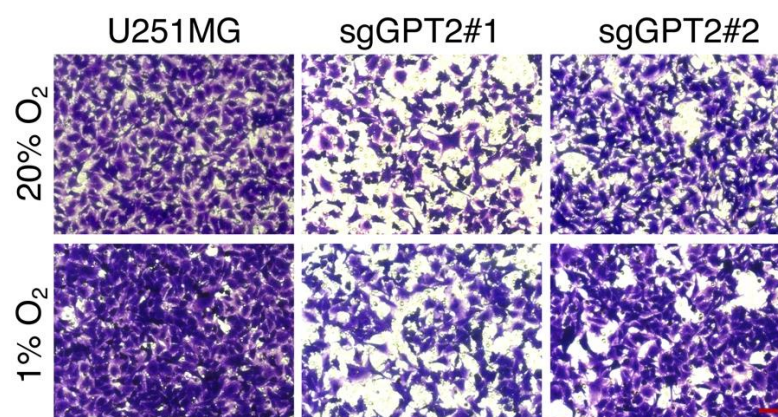

**Figure S1.** GPT2 promotes GBM cell migration in vitro. Parental and GPT2 knockout U251MG cells were seeded onto transwell inserts and exposed to 20% or 1% O<sub>2</sub> for 16 h. Representative cell migration images are shown. Scale bar, 50 µm.

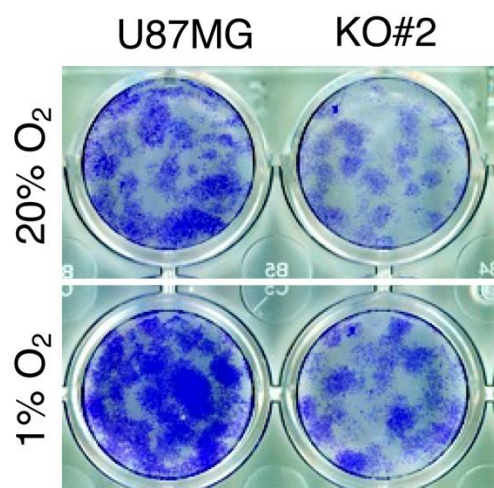

**Figure S2.** GPT2 promotes GBM cell growth in vitro. Parental and GPT2 KO#2 U87MG cells were exposed to 20% or 1% O<sub>2</sub> for 12 days. Colonies were stained with 0.01% crystal violet and imaged. Representative images are shown.
